# Supplementary material for: Physical activity and risk of behavioural and mental health disorders in kindergarten children: analysis of a series of cross-sectional complete enumeration (census) surveys
Source: PubMed Central journal article supplement — BMJ Open. 2020 Mar 19;10(3):e034847. doi: 10.1136/bmjopen-2019-034847 (PMC7103808; doi:10.1136/bmjopen-2019-034847), 2020-03-19
Supplement: bmjopen-2019-034847supp002.pdf [file bmjopen-2019-034847supp002.pdf]

| <b>These questions ask you about your child's vision and hearing. Please tick ✓ the required boxes.</b> |                                                                                                     |
|---------------------------------------------------------------------------------------------------------|-----------------------------------------------------------------------------------------------------|
| <b>VISION</b>                                                                                           |                                                                                                     |
| 1. Do you have any concerns about your child's vision?                                                  | <input type="checkbox"/> Yes <input type="checkbox"/> No                                            |
| If yes, please describe: _____                                                                          |                                                                                                     |
| 2. Has your child been prescribed glasses?                                                              | <input type="checkbox"/> Yes <input type="checkbox"/> No                                            |
| If yes, when should they be worn? (e.g. when reading): _____                                            |                                                                                                     |
| 3. Has your child ever received, or are they receiving medical care for their eyes or vision?           | <input type="checkbox"/> Yes <input type="checkbox"/> No                                            |
| If yes, please describe: _____                                                                          |                                                                                                     |
| <b>HEARING</b>                                                                                          |                                                                                                     |
| 1. Do you have any concerns about your child's hearing or airways?                                      | <input type="checkbox"/> Yes <input type="checkbox"/> No                                            |
| If yes, please describe: _____                                                                          |                                                                                                     |
| 2. Has your child had any of the following? Tick all that apply.                                        |                                                                                                     |
| Repeated ear infections                                                                                 | <input type="checkbox"/> Yes <input type="checkbox"/> No                                            |
| Discharging ears                                                                                        | <input type="checkbox"/> Yes <input type="checkbox"/> No                                            |
| Hearing Loss                                                                                            | <input type="checkbox"/> Yes <input type="checkbox"/> No                                            |
| Grommets                                                                                                | <input type="checkbox"/> Yes <input type="checkbox"/> No    If yes, when were these inserted? _____ |
| Snoring                                                                                                 | <input type="checkbox"/> Yes <input type="checkbox"/> No                                            |
| 3. Has your child ever received or are they receiving medical care for their ears, hearing or airways?  | <input type="checkbox"/> Yes <input type="checkbox"/> No                                            |
| If yes, please describe: _____                                                                          |                                                                                                     |
| Would you like information on any of the following? Tick all that apply.                                |                                                                                                     |
| Wetting pants                                                                                           | <input type="checkbox"/> Yes <input type="checkbox"/> No                                            |
| Wetting the bed                                                                                         | <input type="checkbox"/> Yes <input type="checkbox"/> No                                            |
| Soiling pants                                                                                           | <input type="checkbox"/> Yes <input type="checkbox"/> No                                            |
| This completes the questions relating to the health check conducted by the School Health Nurses.        |                                                                                                     |
| The results will be posted to your nominated address.                                                   |                                                                                                     |
| Please continue answering the questions about your child's development on the following pages.          |                                                                                                     |
| If you have any concerns about your child's health, please see your GP.                                 |                                                                                                     |

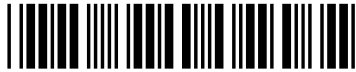

\* 3 7 6 2 5 \*

ACT Health  
**Kindergarten Health Questionnaire**

URN :           Office use only

Please complete all details below in black pen  
**PERSONAL DETAILS OF YOUR CHILD**

Family name: \_\_\_\_\_

Given names: \_\_\_\_\_

DOB: \_\_\_\_\_ Gender: \_\_\_\_\_

**These questions ask you about your child's development.**

**DEVELOPMENT**

1. Please list any concerns about your child's learning, development and behaviour.

2. Do you have any concerns about how your child talks and makes speech sounds?

No  Yes  A little Comments:

3. Do you have any concerns about how your child understands what you say?

No  Yes  A little Comments:

4. Do you have any concerns about how your child uses his or her hands or fingers to do things?

No  Yes  A little Comments:

5. Do you have any concerns about how your child uses his or her arms or legs?

No  Yes  A little Comments:

6. Do you have any concerns about how your child behaves?

No  Yes  A little Comments:

7. Do you have any concerns about how your child gets along with others?

No  Yes  A little Comments:

8. Do you have any concerns about how your child is learning to do things for himself / herself?

No  Yes  A little Comments:

9. Do you have any concerns about how your child is learning school skills?

No  Yes  A little Comments:

10. Please list any other concerns.

Copyright: The Royal Children's Hospital Centre for Community Child Health. Adapted with permission from Frances Page Glascoe and PEDSTest.com LLC.

**Kindergarten Health Questionnaire**

**These questions ask you about your child's strengths and difficulties.**

**Instructions:** For each item, please tick the box for Not True, Somewhat True or Certainly True. It would help us if you answered all items as best you can, even if you are not absolutely certain. Please give your answers on the basis of your child's behaviour over the last 6 months.

| <b>STRENGTHS AND DIFFICULTIES QUESTIONNAIRE</b>                         | <b>Not True</b>          | <b>Somewhat True</b>     | <b>Certainly True</b>    |
|-------------------------------------------------------------------------|--------------------------|--------------------------|--------------------------|
| 1. Considerate of other people's feelings                               | <input type="checkbox"/> | <input type="checkbox"/> | <input type="checkbox"/> |
| 2. Restless, overactive, cannot sit still for long                      | <input type="checkbox"/> | <input type="checkbox"/> | <input type="checkbox"/> |
| 3. Often complains of headaches, stomach-aches or sickness              | <input type="checkbox"/> | <input type="checkbox"/> | <input type="checkbox"/> |
| 4. Shares readily with other children for example toys, treats, pencils | <input type="checkbox"/> | <input type="checkbox"/> | <input type="checkbox"/> |
| 5. Often loses temper                                                   | <input type="checkbox"/> | <input type="checkbox"/> | <input type="checkbox"/> |
| 6. Rather solitary, prefers to play alone                               | <input type="checkbox"/> | <input type="checkbox"/> | <input type="checkbox"/> |
| 7. Generally well behaved, usually does what adults request             | <input type="checkbox"/> | <input type="checkbox"/> | <input type="checkbox"/> |
| 8. Many worries, or often seems worried                                 | <input type="checkbox"/> | <input type="checkbox"/> | <input type="checkbox"/> |
| 9. Helpful if someone is hurt, upset, or feeling ill                    | <input type="checkbox"/> | <input type="checkbox"/> | <input type="checkbox"/> |
| 10. Constantly fidgeting or squirming                                   | <input type="checkbox"/> | <input type="checkbox"/> | <input type="checkbox"/> |
| 11. Has at least one good friend                                        | <input type="checkbox"/> | <input type="checkbox"/> | <input type="checkbox"/> |
| 12. Often fights with other children or bullies them                    | <input type="checkbox"/> | <input type="checkbox"/> | <input type="checkbox"/> |
| 13. Often unhappy, depressed or tearful                                 | <input type="checkbox"/> | <input type="checkbox"/> | <input type="checkbox"/> |
| 14. Generally liked by other children                                   | <input type="checkbox"/> | <input type="checkbox"/> | <input type="checkbox"/> |
| 15. Easily distracted, concentration wanders                            | <input type="checkbox"/> | <input type="checkbox"/> | <input type="checkbox"/> |
| 16. Nervous or clingy in new situations, easily loses confidence        | <input type="checkbox"/> | <input type="checkbox"/> | <input type="checkbox"/> |
| 17. Kind to younger children                                            | <input type="checkbox"/> | <input type="checkbox"/> | <input type="checkbox"/> |
| 18. Often lies or cheats                                                | <input type="checkbox"/> | <input type="checkbox"/> | <input type="checkbox"/> |
| 19. Picked on or bullied by other children                              | <input type="checkbox"/> | <input type="checkbox"/> | <input type="checkbox"/> |
| 20. Often volunteers to help others (parents, teachers, other children) | <input type="checkbox"/> | <input type="checkbox"/> | <input type="checkbox"/> |
| 21. Thinks things out before acting                                     | <input type="checkbox"/> | <input type="checkbox"/> | <input type="checkbox"/> |
| 22. Steals from home, school or elsewhere                               | <input type="checkbox"/> | <input type="checkbox"/> | <input type="checkbox"/> |
| 23. Gets along better with adults than with other children              | <input type="checkbox"/> | <input type="checkbox"/> | <input type="checkbox"/> |
| 24. Many fears, easily scared                                           | <input type="checkbox"/> | <input type="checkbox"/> | <input type="checkbox"/> |
| 25. Good attention span, sees chores or homework through to the end     | <input type="checkbox"/> | <input type="checkbox"/> | <input type="checkbox"/> |

SDQ (P) 04-10 Self-Report Measure © Robert Goodman 2002

| These questions ask you about asthma, eczema and hay fever.                                                                                                                                                                                           |                                |                                                 |                                            |                                                |
|-------------------------------------------------------------------------------------------------------------------------------------------------------------------------------------------------------------------------------------------------------|--------------------------------|-------------------------------------------------|--------------------------------------------|------------------------------------------------|
| <b>RESPIRATORY SYMPTOMS</b>                                                                                                                                                                                                                           |                                |                                                 |                                            |                                                |
| 1. Has your child <u>ever</u> had wheezing or whistling in the chest? <input type="checkbox"/> Yes <input type="checkbox"/> No                                                                                                                        |                                |                                                 |                                            |                                                |
| 2. Has your child <u>ever</u> had asthma? <input type="checkbox"/> Yes <input type="checkbox"/> No                                                                                                                                                    |                                |                                                 |                                            |                                                |
| 3. <u>In the last 12 months</u> has your child experienced <u>any</u> of the following respiratory symptoms?                                                                                                                                          |                                |                                                 |                                            |                                                |
| Wheezing or whistling in the chest <input type="checkbox"/> Yes <input type="checkbox"/> No                                                                                                                                                           |                                |                                                 |                                            |                                                |
| A dry cough at night <u>not</u> associated with a cold or chest infection <input type="checkbox"/> Yes <input type="checkbox"/> No                                                                                                                    |                                |                                                 |                                            |                                                |
| Wheezing with coughs or colds <input type="checkbox"/> Yes <input type="checkbox"/> No                                                                                                                                                                |                                |                                                 |                                            |                                                |
| Shortness of breath when exercising or playing games or participating in sports <input type="checkbox"/> Yes <input type="checkbox"/> No                                                                                                              |                                |                                                 |                                            |                                                |
| 4. <u>In the last 12 months</u> how <u>often</u> , <i>on average</i> , have the following respiratory symptoms been present?<br>Please tick <u>one</u> box on EACH line                                                                               |                                |                                                 |                                            |                                                |
| Wheeze or whistle in the chest                                                                                                                                                                                                                        | <input type="checkbox"/> Never | <input type="checkbox"/> Less than 1 day / wk   | <input type="checkbox"/> 1 – 3 days / wk   | <input type="checkbox"/> 4 or more days / wk   |
| Night cough or night wheeze                                                                                                                                                                                                                           | <input type="checkbox"/> Never | <input type="checkbox"/> Less than 1 night / wk | <input type="checkbox"/> 1 – 3 nights / wk | <input type="checkbox"/> 4 or more nights / wk |
| Shortness of breath (when exercising or playing)                                                                                                                                                                                                      | <input type="checkbox"/> Never | <input type="checkbox"/> Less than 1 day / wk   | <input type="checkbox"/> 1 – 3 days / wk   | <input type="checkbox"/> 4 or more days / wk   |
| <b>ECZEMA</b>                                                                                                                                                                                                                                         |                                |                                                 |                                            |                                                |
| 5. Has your child <u>ever</u> had an itchy rash that was coming and going for <u>at least 6 months</u> ? <input type="checkbox"/> Yes <input type="checkbox"/> No                                                                                     |                                |                                                 |                                            |                                                |
| 6. Has the itchy rash <u>ever</u> affected the following places? <input type="checkbox"/> Yes <input type="checkbox"/> No<br>(the fold of the elbows, behind the knees, in front of the ankles, under the buttocks, or around the neck, ears or eyes) |                                |                                                 |                                            |                                                |
| 7. Has your child <u>ever</u> had eczema? <input type="checkbox"/> Yes <input type="checkbox"/> No                                                                                                                                                    |                                |                                                 |                                            |                                                |
| <b>HAY FEVER</b>                                                                                                                                                                                                                                      |                                |                                                 |                                            |                                                |
| 8. <u>In the past 12 months</u> has your child had a problem with sneezing, or a runny or blocked nose when he / she <u>did not</u> have a cold or the flu? <input type="checkbox"/> Yes <input type="checkbox"/> No                                  |                                |                                                 |                                            |                                                |
| 9. <u>In the past 12 months</u> has this nose problem been accompanied by itchy / watery eyes? <input type="checkbox"/> Yes <input type="checkbox"/> No                                                                                               |                                |                                                 |                                            |                                                |
| 10. Has your child <u>ever</u> had hay fever? <input type="checkbox"/> Yes <input type="checkbox"/> No                                                                                                                                                |                                |                                                 |                                            |                                                |
| 11. Do any close members of the family have any of the following conditions?                                                                                                                                                                          |                                |                                                 |                                            |                                                |
| Asthma <input type="checkbox"/> Yes <input type="checkbox"/> No                                                                                                                                                                                       |                                |                                                 |                                            |                                                |
| Eczema <input type="checkbox"/> Yes <input type="checkbox"/> No                                                                                                                                                                                       |                                |                                                 |                                            |                                                |
| Hay fever <input type="checkbox"/> Yes <input type="checkbox"/> No                                                                                                                                                                                    |                                |                                                 |                                            |                                                |
| <i>Adapted from The International Study of Asthma and Allergies in Childhood (ISAAC): Core questionnaire</i>                                                                                                                                          |                                |                                                 |                                            |                                                |

**These questions ask about your child's food intake and physical activity.**

**WEIGHT PERCEPTION**

1. How would you describe your child's weight?

- Underweight  
 Healthy weight  
 Overweight  
 Obese  
 Don't know

2. Do you have any concerns about your child's weight?

Yes  No

3. Do you have any concerns about your child's height?

Yes  No

Comments: \_\_\_\_\_

**DIET**

The following questions are about the food your child eats.

4. How many serves of vegetables does your child usually eat each day?

*(1 serve = ½ cup cooked vegetables, or ½ medium potato, or 1 medium tomato, or 1 cup salad vegetables)*

- \_\_\_ serves per day *(write number of serves) OR*  
 \_\_\_ serves per week *(write number of serves)*  
 my child doesn't eat vegetables  
 don't know

5. How many serves of fruit does your child usually eat each day?

*(1 serve = 1 medium piece, or 2 small pieces of fruit, or 1 cup of diced pieces with no added sugar, or 30 grams of dried fruit such as 4 dried apricots or 1½ tablespoons sultanas)*

- \_\_\_ serves per day *(write number of serves) OR*  
 \_\_\_ serves per week *(write number of serves)*  
 my child doesn't eat fruit  
 don't know

6. Do you have any concerns about your child's eating habits?

Yes  No

Comments: \_\_\_\_\_

**PHYSICAL ACTIVITY**

The following questions are about your child's physical activity. Physical activity is any activity that increases your heart rate and makes you get out of breath some of the time.

7. On about how many days during the school week does your child usually do physical activity outside of school hours? This includes before and after school sports, playing with friends, walking/ riding to and from school.

- \_\_\_ number of school days per week  
 none  
 don't know

8. On these days, about how many hours does your child usually do physical activity? *(in hours and minutes)*

- \_\_\_ hours \_\_\_ minutes *(average time on each school day)*  
 don't know

9. On about how many days during the weekend does your child usually do physical activity?

- \_\_\_ number of weekend days  
 none  
 don't know

10. On a typical weekend day, about how many hours does your child usually do physical activity?

- \_\_\_ hours \_\_\_ minutes *(average time on each weekend day)*  
 don't know

**Thank you.** Please return the completed form to your child's school in a sealed envelope.  
 The results of the Kindergarten Health Check will be posted to your nominated address
