# Supplementary material for: Physical activity and risk of behavioural and mental health disorders in kindergarten children: analysis of a series of cross-sectional complete enumeration (census) surveys
Source: PubMed Central journal article supplement — BMJ Open. 2020 Mar 19;10(3):e034847. doi: 10.1136/bmjopen-2019-034847 (PMC7103808; doi:10.1136/bmjopen-2019-034847), 2020-03-19
Supplement: bmjopen-2019-034847supp003.pdf [file bmjopen-2019-034847supp003.pdf]

Supplementary Table 1: Odds ratios from logistic regression analyses, sensitivity analysis using categorical physical activity

| SDQ<br>Subscale <sup>(b)</sup> | Logistic regression independent variables <sup>(a)</sup> |                      |                                      |             |             |             |                             |             |             |                                 |                                |                      |             |
|--------------------------------|----------------------------------------------------------|----------------------|--------------------------------------|-------------|-------------|-------------|-----------------------------|-------------|-------------|---------------------------------|--------------------------------|----------------------|-------------|
|                                | Sex                                                      | Indigenous<br>status | Socio-economic status <sup>(c)</sup> |             |             |             | Physical activity (minutes) |             |             | Under-<br>weight <sup>(d)</sup> | Over-<br>weight <sup>(d)</sup> | Obese <sup>(d)</sup> | Age         |
|                                |                                                          |                      | Q1                                   | Q2          | Q3          | Q4          | 30 to <60                   | 60 to <90   | ≥90         |                                 |                                |                      |             |
|                                | <b>Odds Ratio (95% CI)</b>                               |                      |                                      |             |             |             |                             |             |             |                                 |                                |                      |             |
| <i>Total</i>                   | 1.80                                                     | 2.69                 | 1.85                                 | 1.50        | 1.29        | 1.28        | 0.95                        | 0.67        | 0.93        | 1.06                            | 1.04                           | 1.85                 | 1.03        |
| <i>difficulties</i>            | (1.49-2.17)                                              | (1.76-4.11)          | (1.37-2.48)                          | (1.11-2.02) | (0.96-1.75) | (0.94-1.75) | (0.71-1.28)                 | (0.49-0.91) | (0.71-1.22) | (0.73-1.54)                     | (0.79-1.37)                    | (1.27-2.70)          | (1.00-1.05) |
| Emotional                      | 0.97                                                     | 1.96                 | 1.25                                 | 1.09        | 0.95        | 0.90        | 0.90                        | 0.81        | 0.84        | 0.98                            | 0.94                           | 1.77                 | 1.04        |
| <i>difficulties</i>            | (0.83-1.13)                                              | (1.29-2.98)          | (0.99-1.59)                          | (0.85-1.38) | (0.75-1.21) | (0.71-1.16) | (0.70-1.15)                 | (0.63-1.04) | (0.66-1.06) | (0.70-1.36)                     | (0.74-1.20)                    | (1.28-2.46)          | (1.01-1.06) |
| Conduct                        | 1.56                                                     | 1.65                 | 1.48                                 | 1.32        | 1.08        | 0.98        | 1.05                        | 0.91        | 1.08        | 0.58                            | 1.29                           | 1.15                 | 1.02        |
| <i>problems</i>                | (1.35-1.82)                                              | (1.08-2.52)          | (1.17-1.86)                          | (1.05-1.67) | (0.85-1.37) | (0.77-1.25) | (0.82-1.35)                 | (0.71-1.18) | (0.86-1.37) | (0.39-0.86)                     | (1.05-1.59)                    | (0.79-1.68)          | (1.00-1.04) |
| Hyperactivity                  | 2.03                                                     | 1.84                 | 1.34                                 | 1.27        | 0.90        | 1.04        | 0.87                        | 0.69        | 0.88        | 0.91                            | 1.09                           | 1.39                 | 1.01        |
| <i>&amp; inattention</i>       | (1.76-2.34)                                              | (1.25-2.70)          | (1.08-1.66)                          | (1.03-1.57) | (0.73-1.13) | (0.84-1.29) | (0.70-1.08)                 | (0.55-1.87) | (0.71-1.08) | (0.67-1.22)                     | (0.89-1.33)                    | (1.01-1.93)          | (0.99-1.02) |
| Peer problems                  | 2.72                                                     | 1.41                 | 1.65                                 | 1.21        | 1.68        | 1.76        | 0.91                        | 0.64        | 0.60        | 2.42                            | 1.89                           | 1.96                 | 1.03        |
| <i></i>                        | (1.60-4.61)                                              | (0.34-5.82)          | (0.74-3.69)                          | (0.52-2.81) | (0.77-3.65) | (0.81-3.83) | (0.46-1.81)                 | (0.30-1.33) | (0.30-1.20) | (1.18-4.98)                     | (1.02-3.51)                    | (0.70-5.49)          | (0.97-1.10) |
| Prosocial                      | 2.48                                                     | 0.65                 | 1.25                                 | 1.13        | 1.34        | 1.27        | 0.70                        | 0.54        | 0.52        | 1.07                            | 1.12                           | 1.03                 | 1.00        |
| <i></i>                        | (1.94-3.18)                                              | (0.24-1.76)          | (0.86-1.82)                          | (0.78-1.64) | (0.94-1.91) | (0.88-1.82) | (0.50-0.97)                 | (0.38-0.77) | (0.38-0.73) | (0.68-1.68)                     | (0.80-1.57)                    | (0.56-1.91)          | (0.97-1.03) |

(a) Reference categories: girls, non-Indigenous, Q5 - least disadvantaged, healthy weight (BMI), physical activity < 30 minutes daily; age is continuous.

(b) Each category excludes those children for which the reported measure is not available.

(c) Socioeconomic status based on ACT quintiles of relative disadvantage from IRSD at SA1 level. Q1 – most disadvantaged; Q5 – least disadvantaged.

(d) Based on BMI.
